# Supplementary material
Source: PubMed Central journal article supplement (PMC3335196)
Supplement: NIHMS361029-supplement-NCOMMS-11-01598B.pdf [file NIHMS361029-supplement-NCOMMS-11-01598B.pdf]

## **Reprogramming within hours following nuclear transfer into mouse but not human zygotes**

Dieter Egli, Alice E. Chen, Genevieve Saphier, Claire Fitzgerald, Kathryn J. Go, Nicole Acevedo, Jay Patel, Manfred Baetscher, William G. Kearns, Robin Goland, Rudolph L. Leibel, Douglas A. Melton and Kevin Eggan

Content:

Supplementary Figures S1-S17

Supplementary Tables S1-S7

## Supplementary Figures

### a Incomplete chromosome condensation

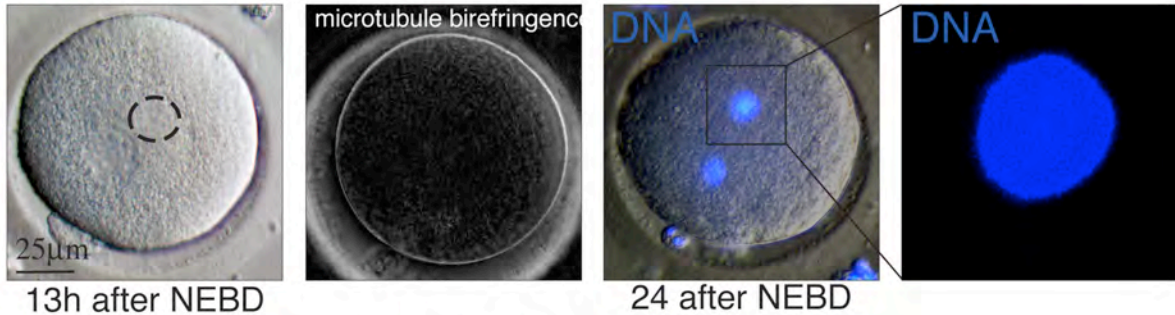

### b Incomplete dissolution of nucleoli

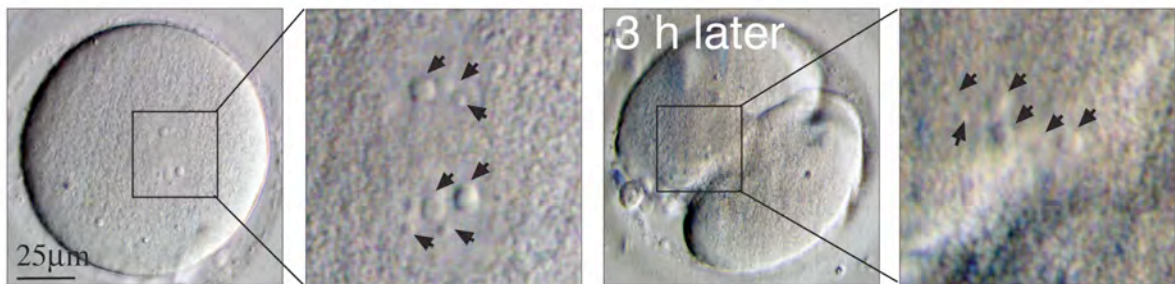

### c Failure to assemble a spindle

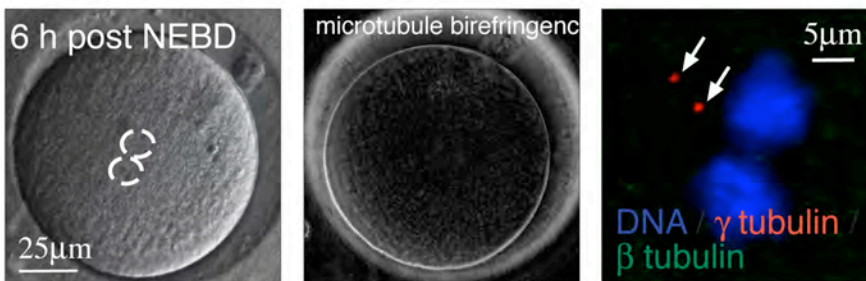

## Supplementary Figure S1. Mitotic defects of cryopreserved human zygotes

**a**, zygote with asynchronous nuclear envelope breakdown and a failure to completely condense chromosomes. 13h post breakdown of the first nuclear envelope (circled), the second nuclear envelope is still intact. After 24h, both nuclear envelopes are broken down, but the chromosomes are not condensed. Absence of microtubule birefringence indicates failure to assemble a spindle. **b**, zygote that attempts (but ultimately fails) cleavage without completely dissolving the nucleoli. Both nuclear envelopes are broken down. Arrows point to nucleoli. **c**, Zygote arrested in mitosis. The two arrows point to the two  $\gamma$  tubulin marked centrosomes that normally nucleate a beta-tubulin positive spindle. NEBD = nuclear envelope breakdown.

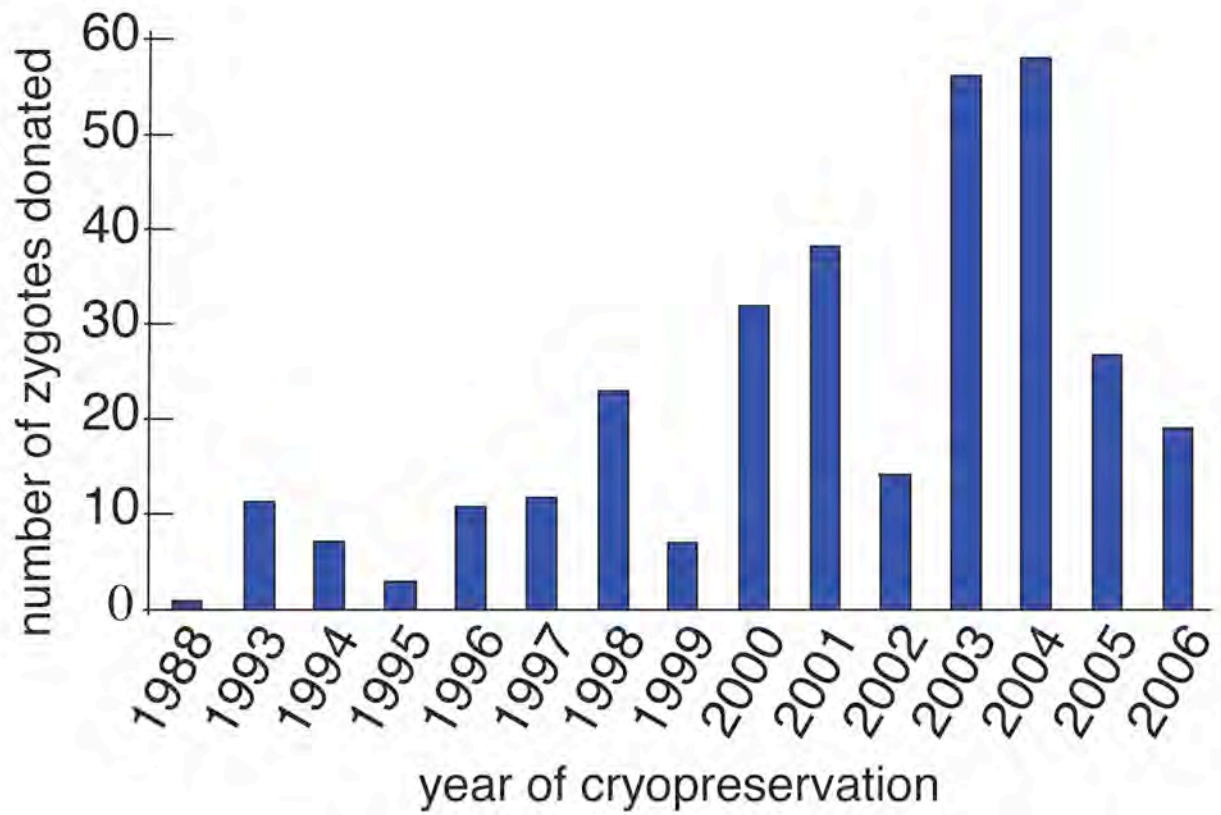

**Supplementary Figure S2. Human zygotes donated for research by year of cryopreservation**

Shown is the number of zygotes donated to research obtained by year of cryopreservation.

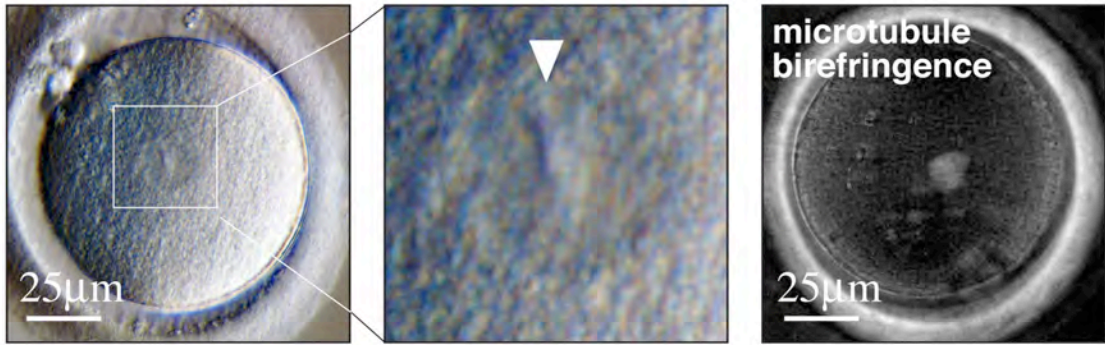

zygote frozen in mitosis  
30min post thaw

spindle birefringence  
30min after thaw

**Supplementary Figure S3. Spindle assembly after cryopreservation of human zygotes in mitosis**

Human zygote 30 minutes after thaw. The arrowhead points to the chromosomes at the metaphase plate. A birefringent spindle is present.

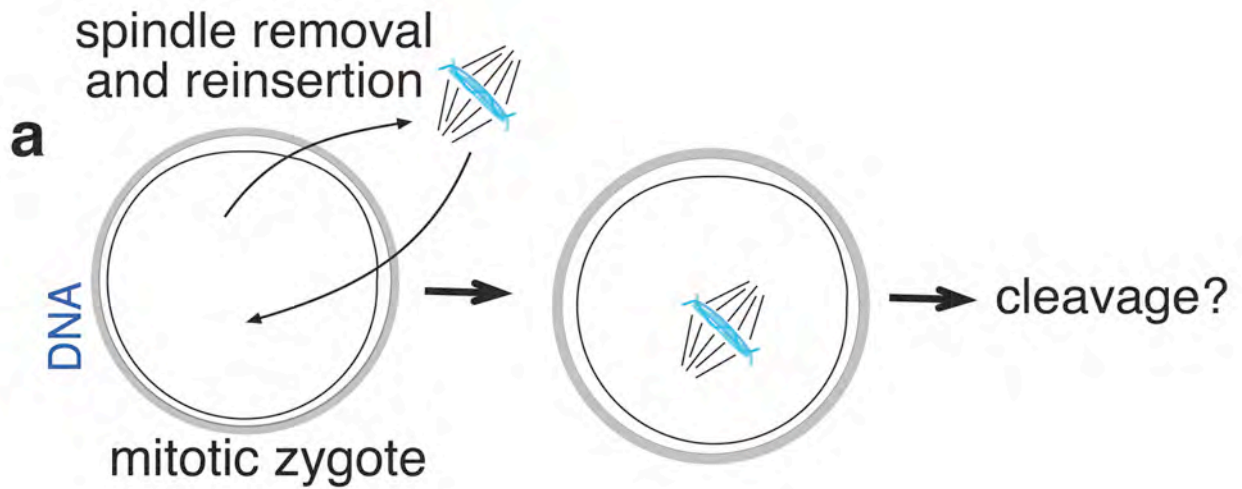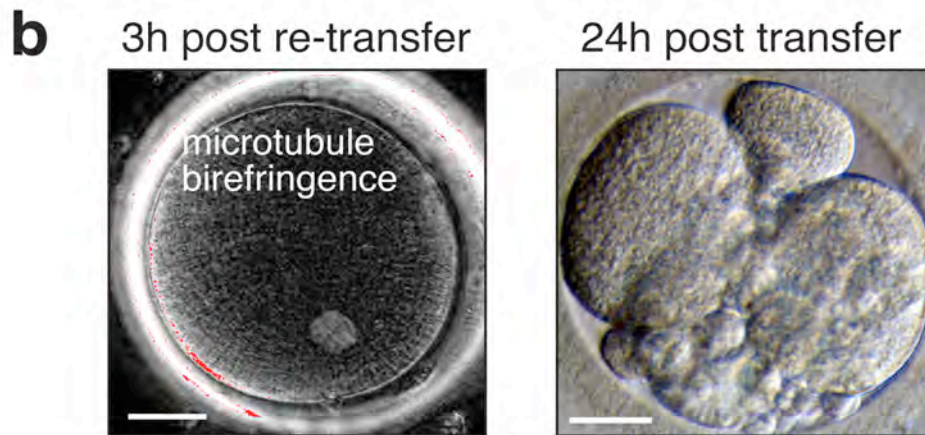

**Supplementary Figure S4. Abnormal cleavage of human zygotes after spindle removal and re-transfer**

**a**, Schematic of the spindle removal and retransfer. **b**, zygote 3h post re-transfer, and after attempted cleavage. Scale bar: 25 $\mu$ m.

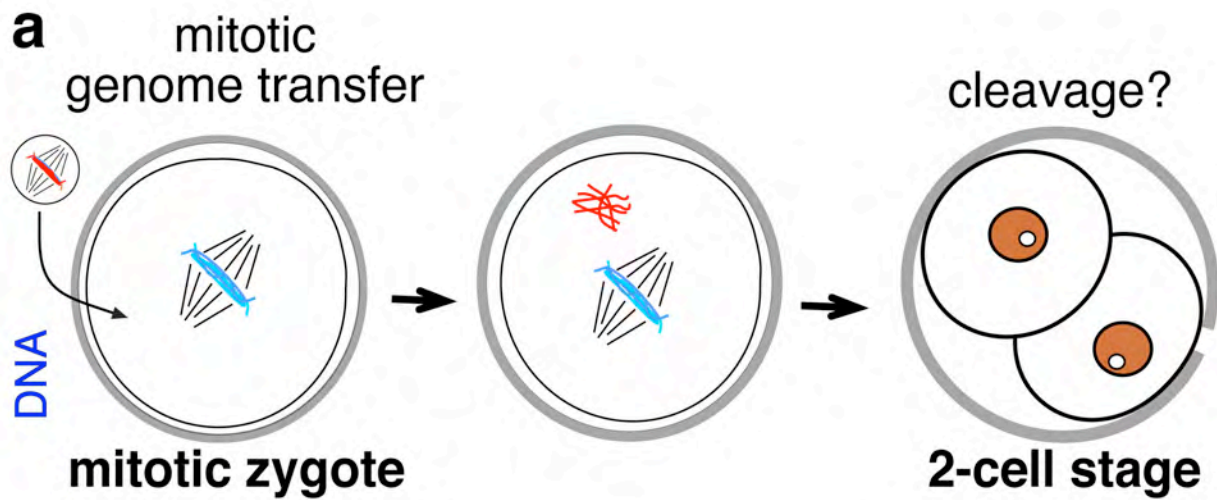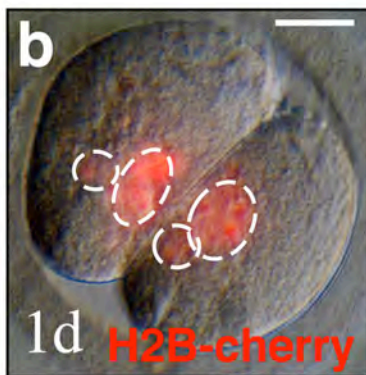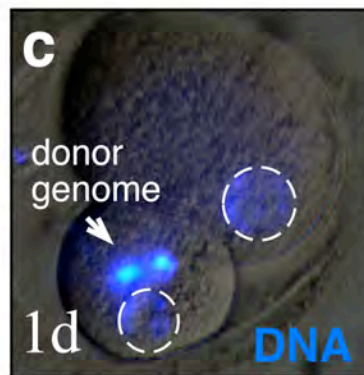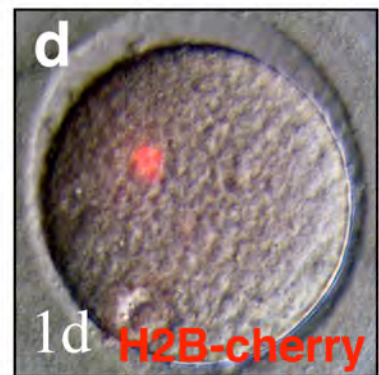

**Supplementary Figure S5. Inefficient incorporation of donor chromatin into a spindle**

**a**, Schematic showing the transfer of the somatic genome, but not the removal of the zygotic genome, resulting in a cell containing both genomes. **b-d**, 1 day after direct injection of a mitotic genome (red) into a zygote in mitosis without removal of the zygotic genome. **b**, Nuclei are circled. **c**, The arrow points to the injected genome, the endogenous zygotic genome is circled. **d**, H2B-cherry marked donor chromosomes were used, therefore the injected genome is marked by H2B-cherry, the zygote arrested in mitosis. Scale bar: 25 $\mu$ m.

### a Nuclear transfer into human zygotes

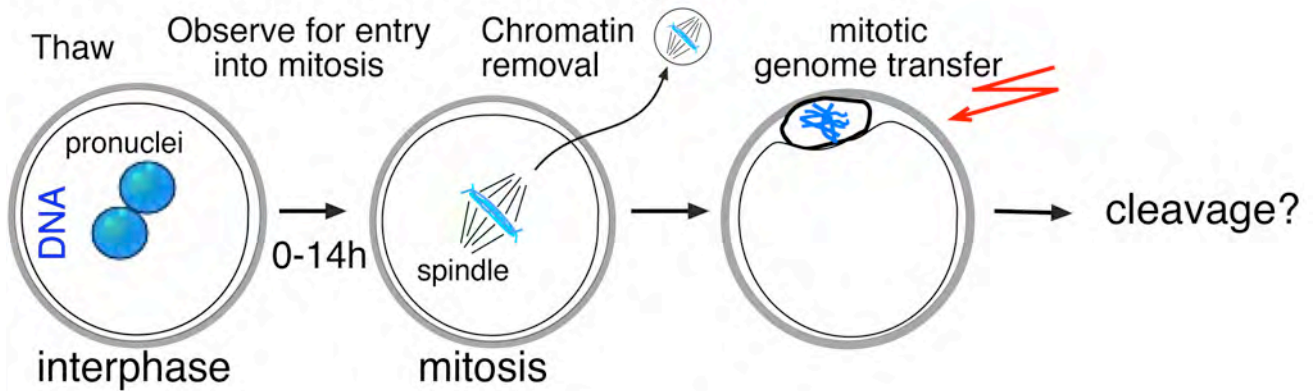

### Failure to cleave after nuclear transfer

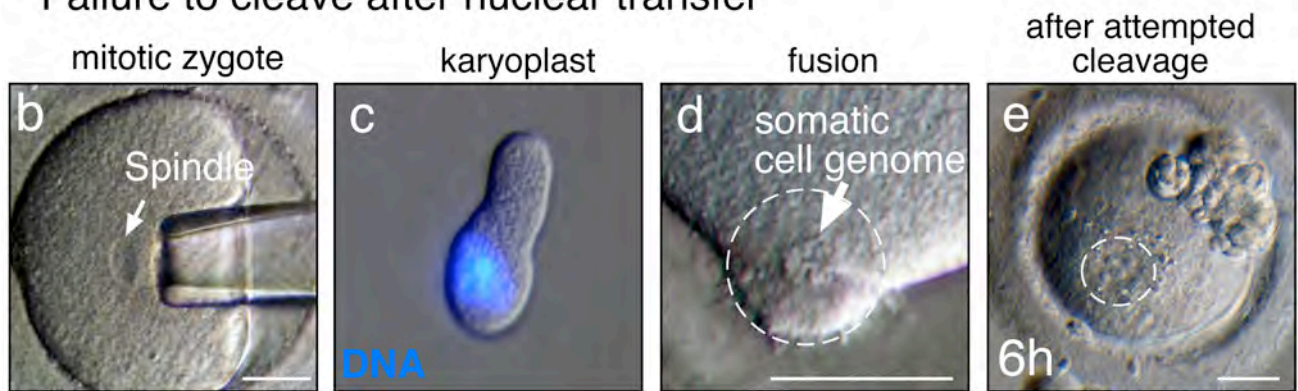

### Supplementary Figure S6. Cleavage failure after nuclear transfer into human zygotes

**a**, Schematic of initial nuclear transfer experiments with human zygotes. The question was whether human zygotes can segregate a transferred mitotic genome into two cells. **b**, zygote in mitosis being enucleated, **c**, removed zygotic genome. **d**, mitotic somatic cell (circled) fusing to the enucleated zygote, the arrow points to the mitotic chromosomes. **e**, Arrested nuclear transfer cell, the nucleus is circled. Time is hours after transfer. Scale bar: 25 $\mu$ m.

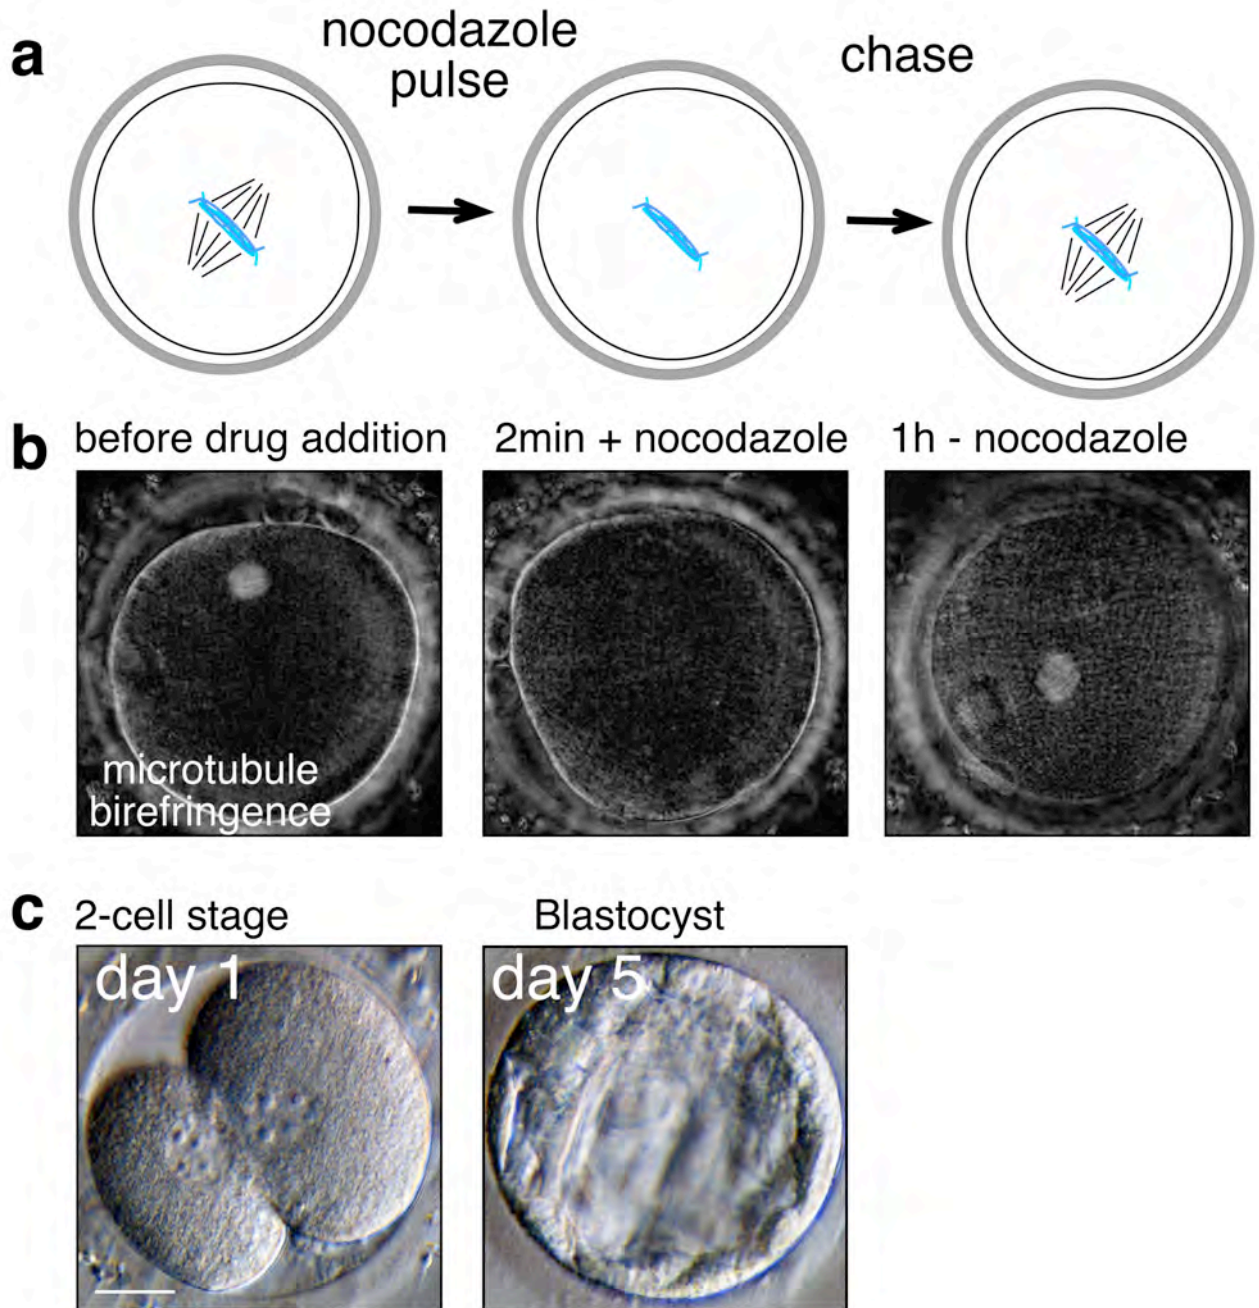

**Supplementary Figure S7. Transient nocodazole exposure is compatible with development to the blastocyst stage**

Cleavage and development to the blastocyst stage after depolymerization of the spindle by nocodazole at the first mitosis in human zygotes. **a**, schematic representation, **b**, zygote in mitosis imaged by microtubule birefringence. Note that the spindle reassembles after depolymerization by nocodazole. **c**, Cleavage and development to the blastocyst stage. Days indicate the number of days after IVF. Scale bar: 25 $\mu$ m.



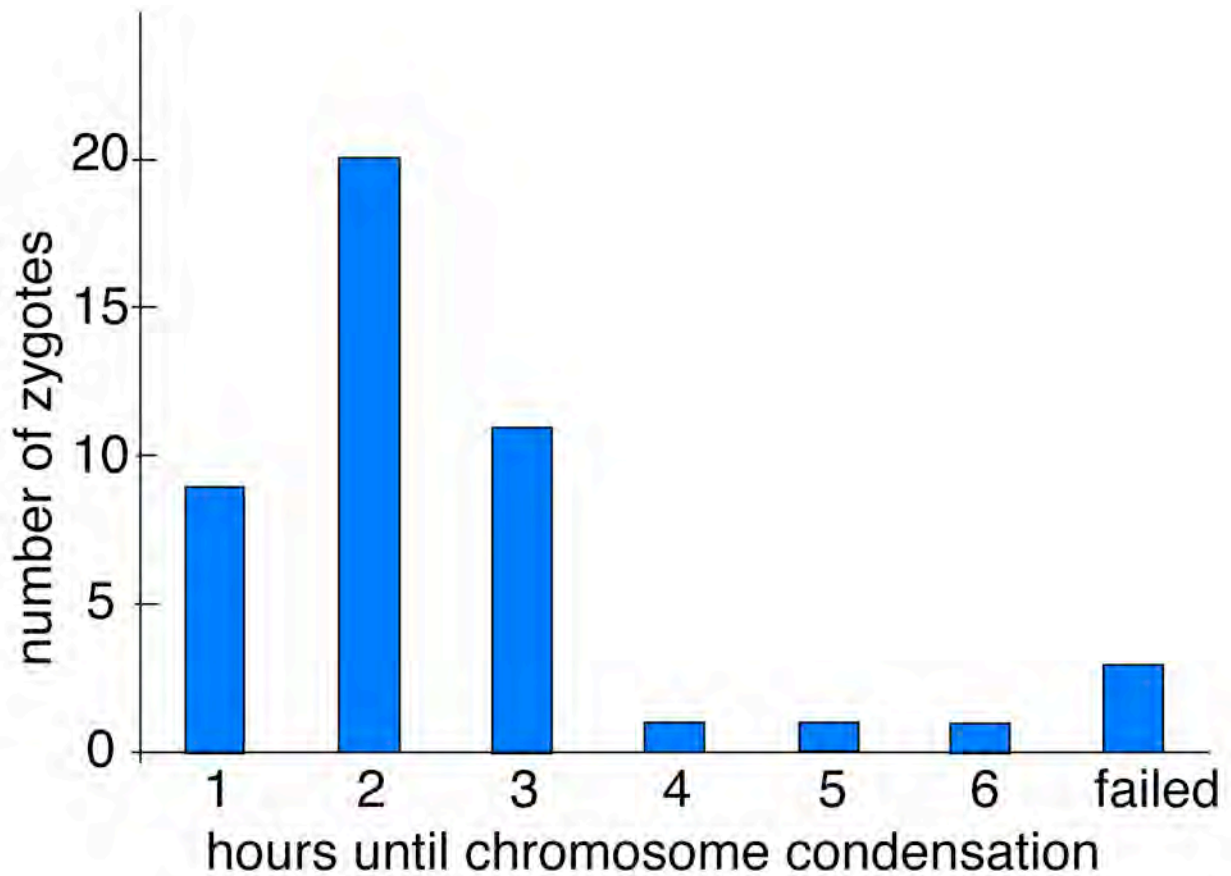

**Supplementary Figure S8. Timing of chromosome condensation after nuclear transfer into human zygotes**

Shown is the number of zygotes that had condensed the somatic chromosomes at the indicated time point. Note that chromosome condensation is efficient and occurs in most cases within 3 hours after transfer.

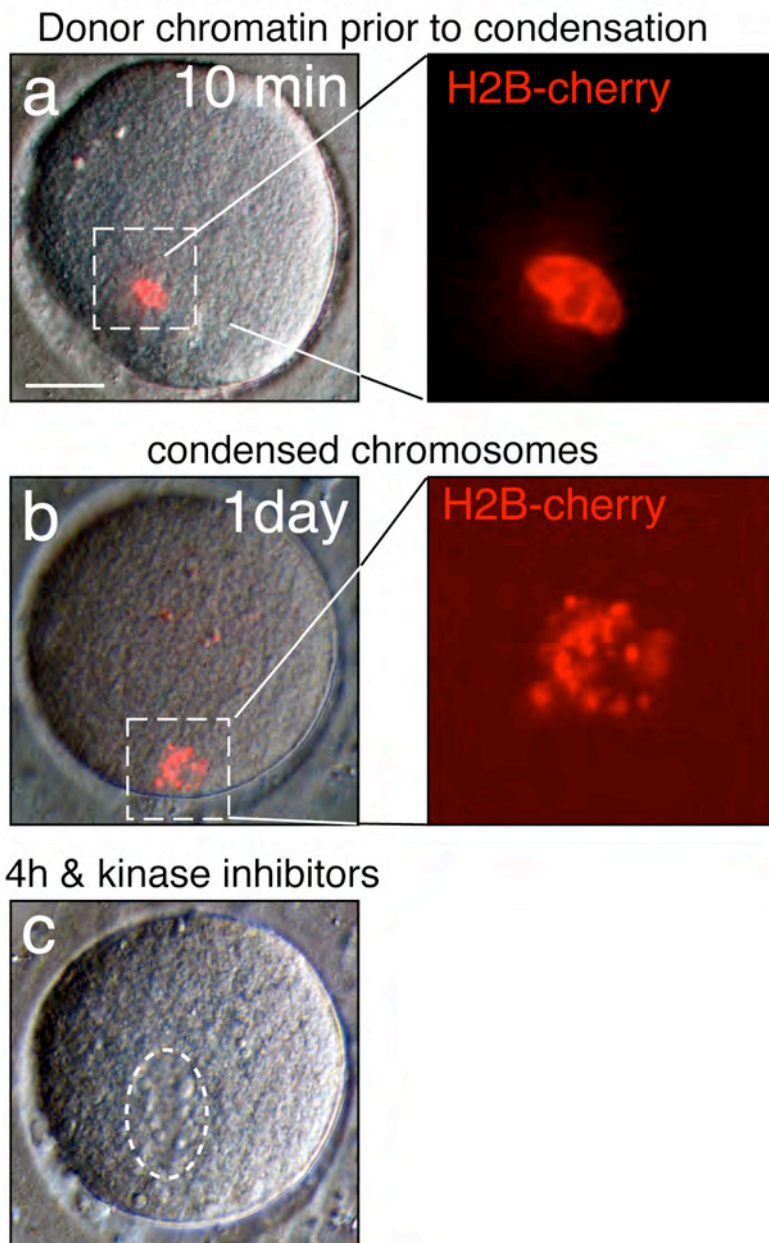

**Supplementary Figure S9. Human zygotes do not spontaneously exit mitosis after transfer of a G0 genome**

**a**, Zygote 10min after fusion of a somatic cell nucleus, without removal of the zygotic genome. **b**, 1d after transfer, the cell is arrested at the 1-cell stage, in mitosis. **c**, Addition of kinase inhibitors 6-DMAP and purvalanolA allows entry into interphase. Scale bar: 25 $\mu$ m.

## developmental stage for array analysis (human)

nuclear transfer

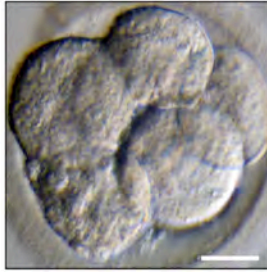

amanitin

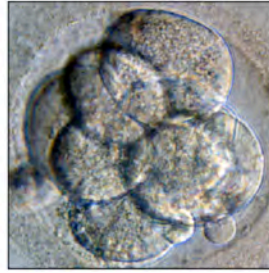

IVF

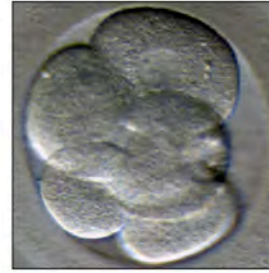

induced aneuploidy

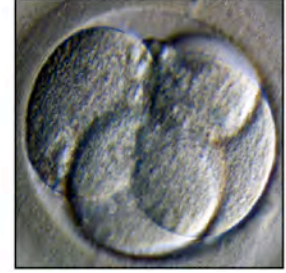

### Supplementary Figure S10. Representative samples used for array analysis

Specimen at the stage used for transcriptional analysis, note equivalent morphological appearance in each group. Scale bar: 25 $\mu$ m.

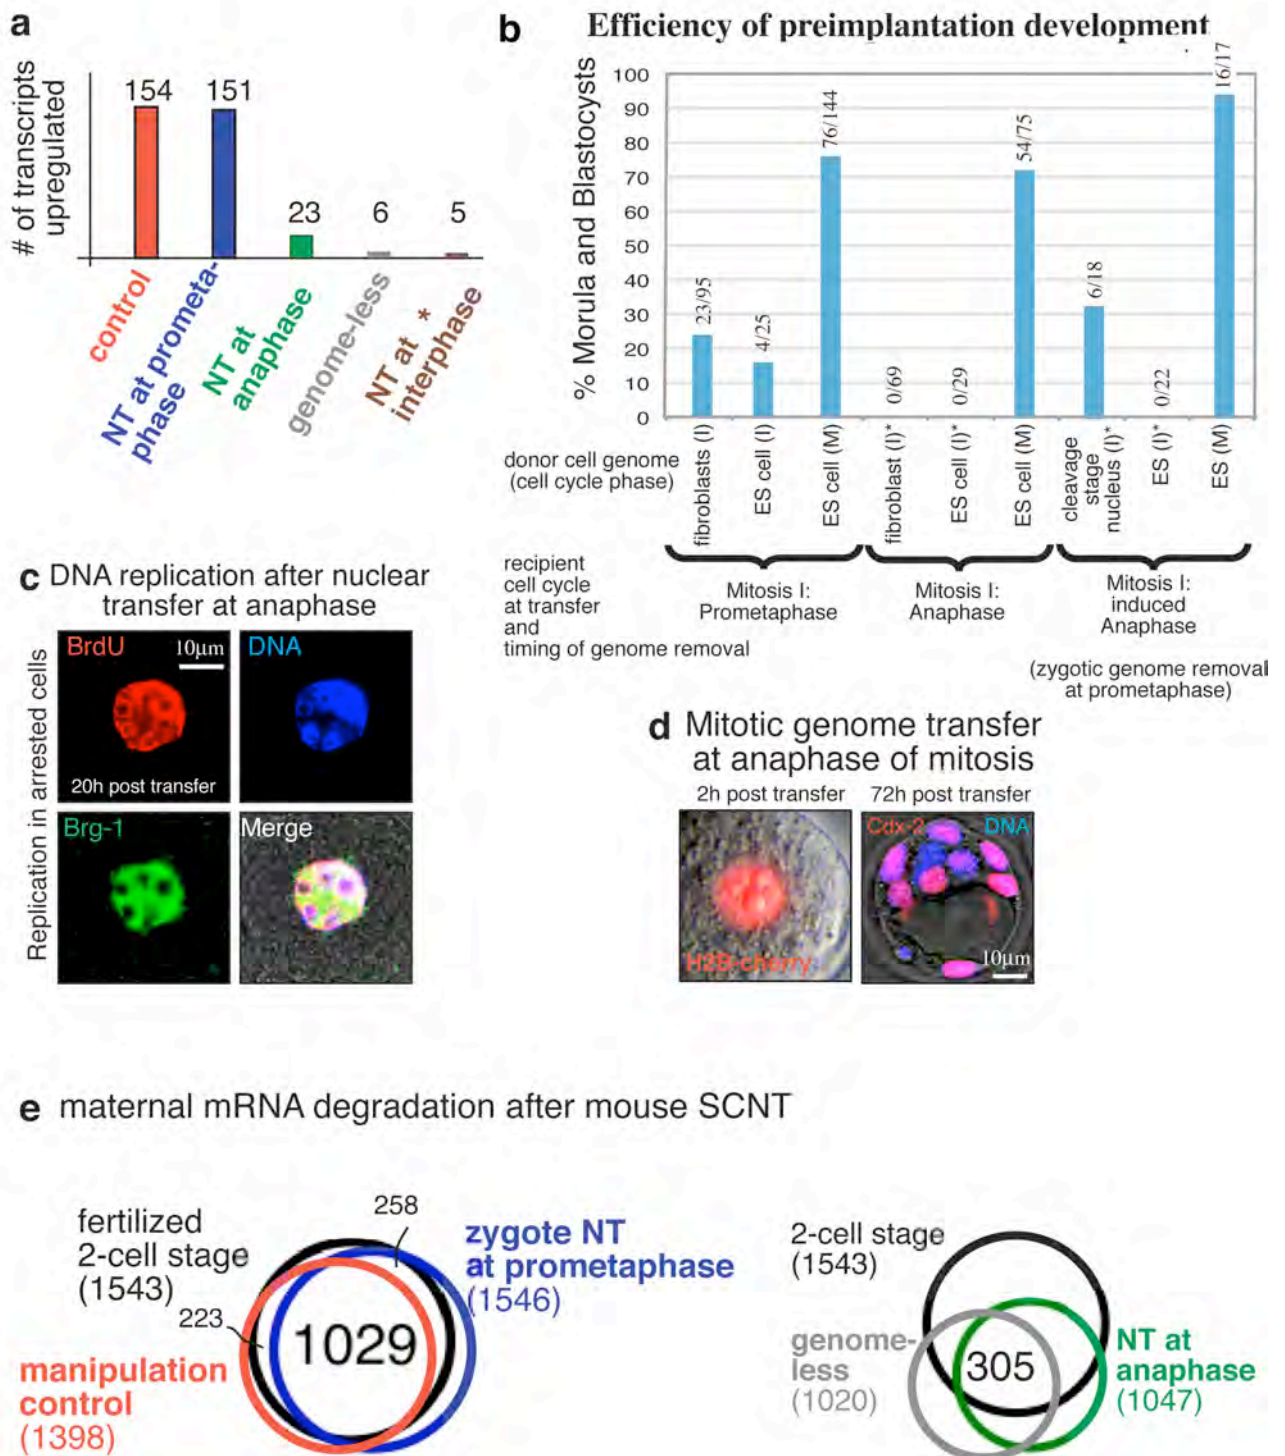

**Supplementary Figure S11. Transcriptional reprogramming and development after nuclear transfer into mouse zygotes**

**a**, Upregulation of genes not expressed in the somatic donor cells, and not expressed in M-phase zygotes. Controls are zygotes exposed to drugs as used after nuclear transfer. \*NT at interphase data taken from ref. 31. **b**, Efficiency of development to the morula and blastocyst stages. Anaphase zygotes were obtained by release from nocodazole arrest or by inhibition of mitotic kinases (induced anaphase) \* Chromosome condensation is inefficient or does not occur under the conditions marked with a star. Numbers indicated the number of morulas and blastocysts of successfully transferred (cleaved) zygotes. Detailed results are presented

in Supplementary Table S3. **c**, Despite developmental and transcriptional arrest after nuclear transfer at anaphase, Brg-1, that is involved in zygotic genome activation<sup>57</sup>, localizes to the nucleus. Replication is also initiated, indicating that cell cycle arrest occurs at S phase or G2 phase. Embryos never progressed to the next mitosis. **d**, mitotic genome transfer of an ES cell into anaphase zygotes rescues developmental potential. The nucleus is immediately remodeled to an embryonic morphology, and development to the blastocyst stage occurs. Cdx2 expression indicates transcriptional reprogramming. **e**, maternal mRNA degradation in fertilized controls, manipulation controls, genome-less cells, and after nuclear transfer into mitotic mouse zygotes at prometaphase or at anaphase. The number of total transcripts downregulated for each group is given in parenthesis. Samples were harvested 22-24h post transfer or post mitosis. Differential regulation was defined as <0.2x change average signal between zygotes and the indicated groups,  $p < 0.01$ .

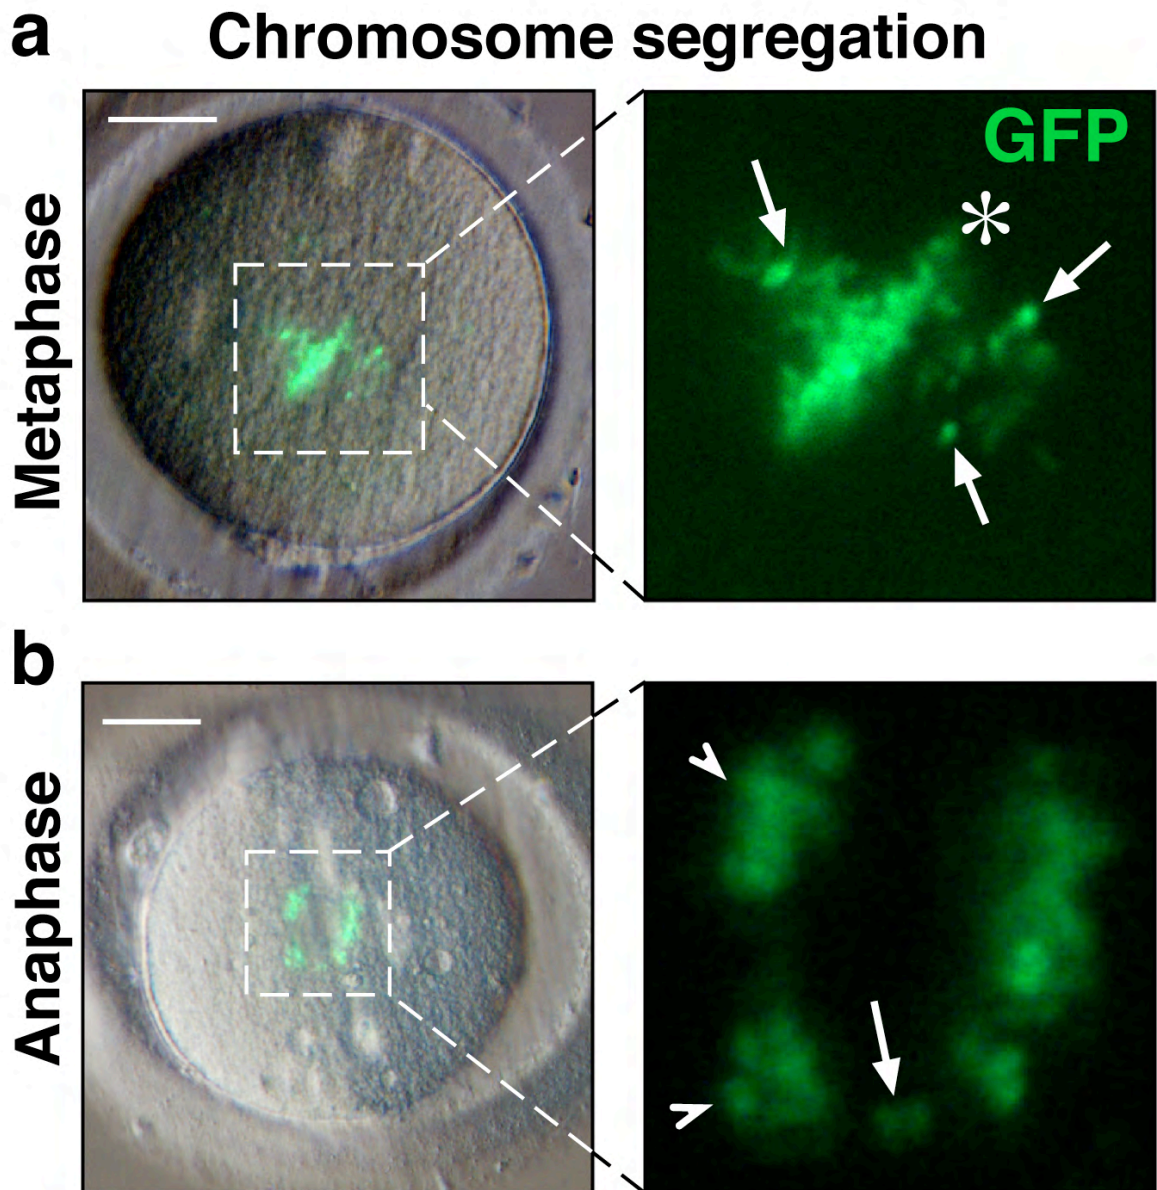

**Supplementary Figure S12. Defects in chromosome segregation after nuclear transfer into human zygotes**

Transfer was done as in Figure 2 with inhibition of the first cytokinesis. The second embryonic mitosis is shown. **a**, Nuclear transfer cell at metaphase of mitosis. The star indicates the metaphase plate and the arrows unincorporated chromosomes. **b**, Nuclear transfer cell at anaphase, arrow points to a lagging chromosome, arrowheads point to separation of a chromosome complement into two groups, resulting in multinucleation. Scale bar: 25 $\mu$ m.

## gene expression in aneuploid blastomeres (human)

upregulation of zygotic transcripts

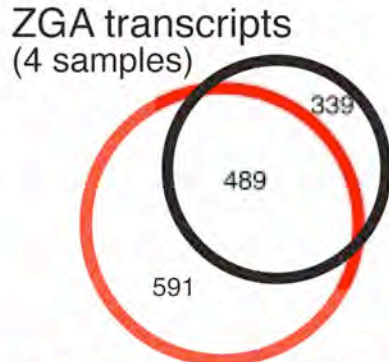

maternal mRNA degradation

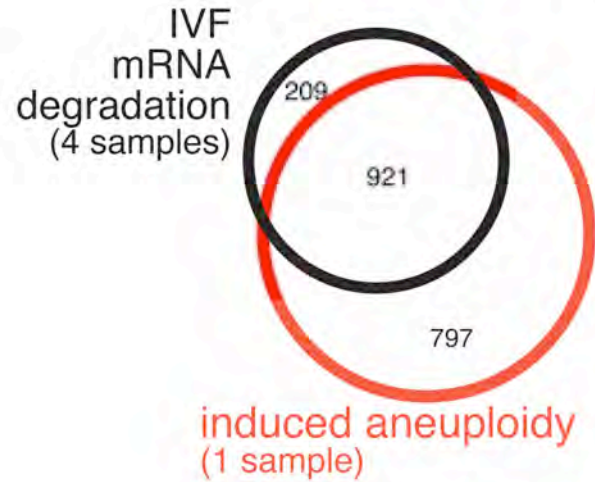

### Supplementary Figure S13. ZGA and maternal mRNA degradation in aneuploid human embryos

Upregulation of zygotic transcripts and maternal mRNA degradation in after induced aneuploidy (n=1 sample, n=2 specimen of 3 and 5 cells, >5 fold upregulation or <0.2-fold downregulation down-regulation compared to a 1-cell zygote,  $p < 0.001$ ).

4 $\mu$ g/ml nocodazole 1h + nocodazole

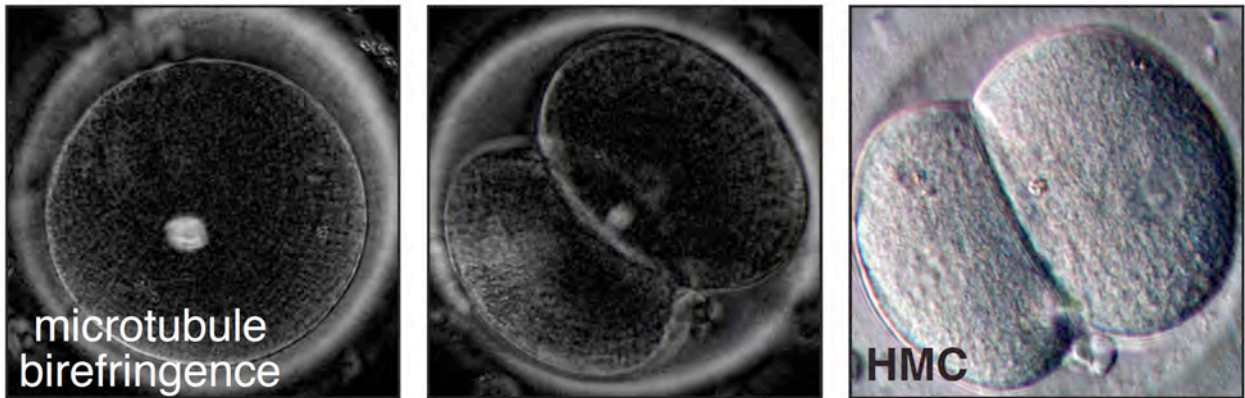

**Supplementary Figure S14. Low nocodazole concentrations fail to inhibit progression of human zygotes through mitosis**

Human mitotic zygote in the presence of 4 $\mu$ g/ml nocodazole for 40 min. After 70min, the zygote is cleaving. HMC: Hoffmann modulation contrast.



## Effect of vinblastine on human mitotic zygotes

**a** before drug addition 2min + vinblastine 4.5h - vinblastine

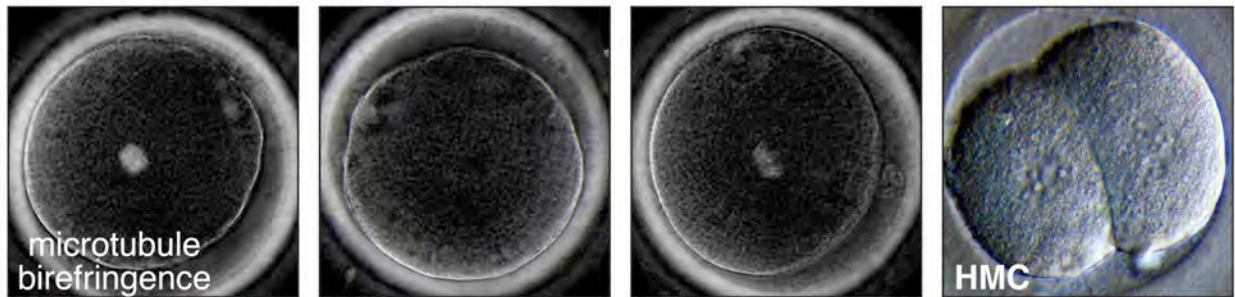

spindle depolymerization by vinblastine

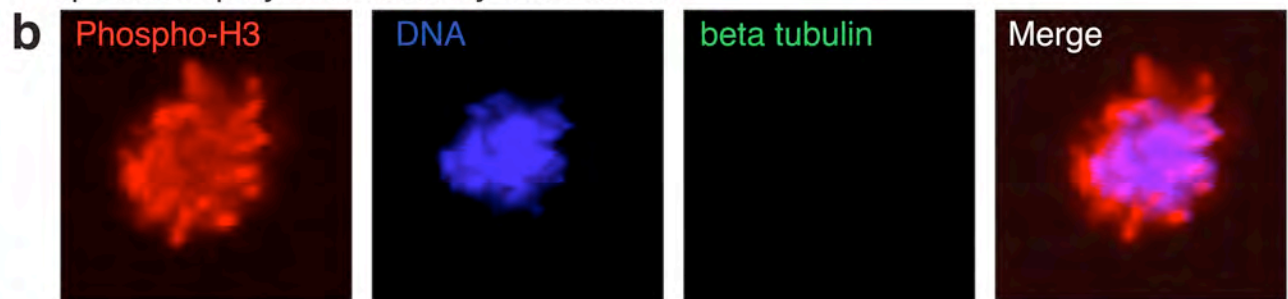

### Supplementary Figure S15. Reversible spindle depolymerization by vinblastine in human zygotes

**a**, Mitotic zygote before drug addition, 2 min after addition of 1  $\mu$ M vinblastine, 4.5h after removal of vinblastine, and cleavage to 2 cells. **b**, Immunohistochemistry of a mitotic zygote exposed to 1  $\mu$ M vinblastine. Note that virtually no  $\beta$ -tubulin is associated with the chromosomes. HMC: Hoffmann modulation contrast.

aspirated karyoplast

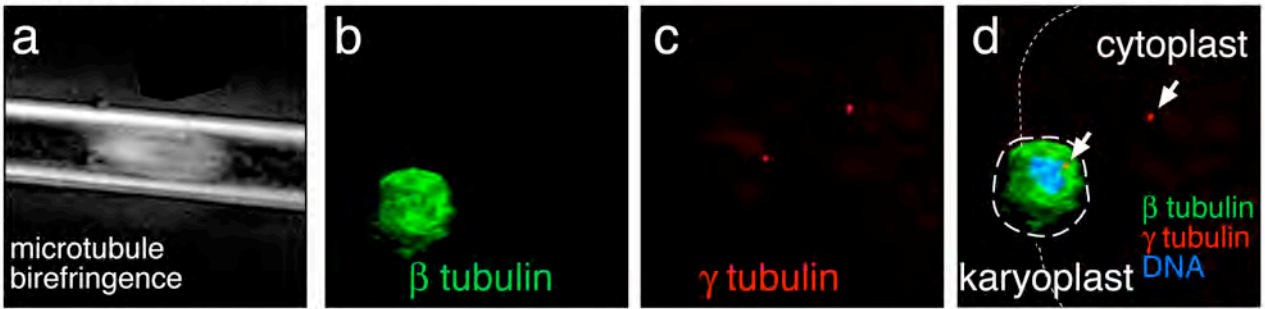

karyoplast

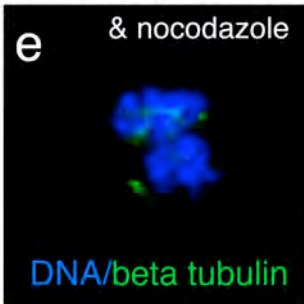

### Supplementary Figure S16. Removal of spindle material with the zygotic human genome

Spindle material is removed with the human zygotic genome. **a**, Spindle in the aspiration pipette. **b-d**, immunofluorescence. All resulting cells arrest at the next mitosis with abnormal spindles, despite inhibition of the first cytokinesis after somatic cell genome transfer (18/18). Arrow points to a centrosome that was not removed with the zygotic genome. The dotted lines indicate the boundary of the zygote or the karyoplast. **e**, Nocodazole addition (50 $\mu$ g/ml) prior to mitotic entry decreases removal of spindle components. Zygotic genome removed after inhibition of spindle assembly by incubation into nocodazole at the 2PN stage.

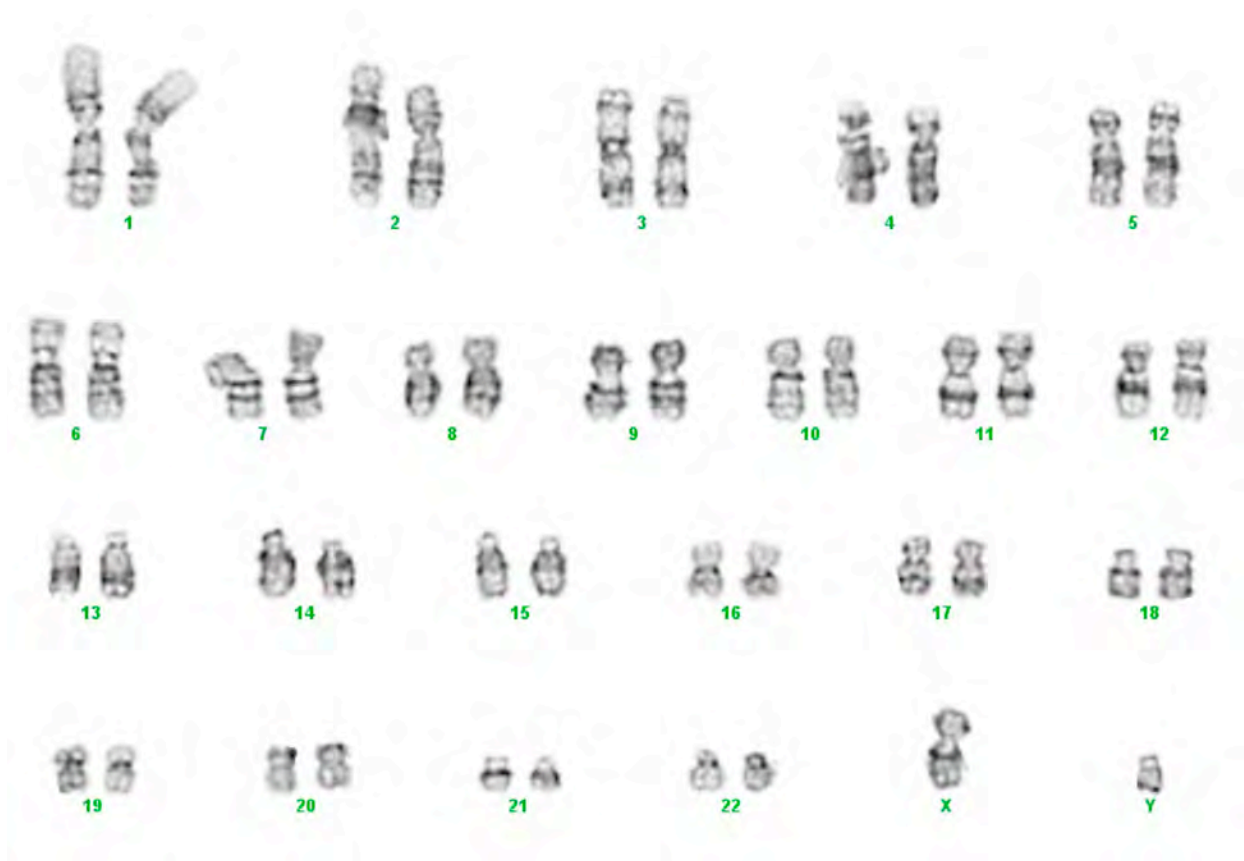

**Supplementary Figure S17. Karyotype of the somatic donor cell line**

This cell line of an adult T1D male was used for nuclear transfer. It has a normal karyotype (46XY).

## Supplementary Tables

**Supplementary Table S1. Developmental potential after nuclear transfer**, and of parthenotes, and zygotes developing in  $\alpha$ -amanitin, or other control conditions. The first row (mitotic removal of spindle material). The number indicated under category 'cleaved' consists of the number of zygotes that developed beyond that stage and of the zygotes that arrested after the first cleavage. All cells are human. \* only one of the two had the somatic cell genome segregated to the two blastomeres. 12 zygotes used for nuclear transfer are not included in this table because of a failure to complete manipulations properly.

| Type of cell/source | Manipulation                                                       | Total #used | Total # survived | 1-cell arrested | fragmented | cleaved | 4-6 cell | 7-8 cell        | Blastocyst |
|---------------------|--------------------------------------------------------------------|-------------|------------------|-----------------|------------|---------|----------|-----------------|------------|
| Zygote              | None (control)                                                     | 28          | 28               | 8               | 2          | 18      | 4        | 4               | 9          |
| Zygote              | Spindle retransfer                                                 | 10          | 5                | 1               | 2          | 2       | 1        | -               | -          |
| Zygote              | Somatic cell transfer without enucleation                          | 15          | 11               | 7               | 2          | 2*      | 1        | -               | -          |
| Zygote              | Nuclear transfer                                                   | 30          | 8                | 8               | -          | -       | -        | -               | -          |
| Zygote              | Nuclear transfer (inhibition of cleavage)                          | 15          | 8                | 8               | -          | -       | -        | -               | -          |
| Zygote              | Nuclear transfer (nocodazole at 2PN stage, inhibition of cleavage) | 69          | 53               | 17              | 3          | 33      | 16       | 7 (2 compacted) | -          |
| Zygote              | alpha-amanitin                                                     | 23          | 23               | -               | 1          | 22      | 14       | 4               | -          |
| Zygote              | Inhibition of first cleavage (tetraploid)                          | 17          | 17               | 6               | 2          | 9       | 3        | 2 (1 compacted) | -          |
| Zygote              | Electrical pulse in mitosis (control)                              | 4           | 4                | nd              | nd         | nd      | nd       | nd              | 1          |
| Polyspermic zygote  | None (control)                                                     | 7           | 7                | 2               | 1          | 4       | 1        | 3 (2 compacted) | -          |
| Polyspermic zygote  | Nuclear transfer                                                   | 9           | 9                | 4               | 1          | 2       | 2        | -               | -          |

**Supplemental Table S2.** Cryopreserved mouse zygotes are suitable recipients for mitotic genome transfer.

| Transferred | Cleaved | Morula & Blastocysts |
|-------------|---------|----------------------|
| 28          | 18      | 8 (41% of cleaved)   |

**Supplementary Table S3.** Developmental potential after nuclear transfer into mouse oocytes and zygotes.

I, interphase; M, mitosis; A, Anaphase of mitosis; zyg, zygote; PS, pluripotent stem cell (ESC); 8-12 cell: blastomeres. \* shows the number of cells with interphase nuclei in the first interphase after transfer and inhibition of cytokinesis. G1: interphase synchronized by release from mitotic nocodazole arrest for 1h. N/A: not applicable. P/D: purvalanol A and 6-DMAP.

| recipient (cell cycle stage at transfer) | donor (cell cycle stage) | recipient genome removal | # manip | First interphase | Second interphase | morulae d3.5 | blastocysts d3.5 | morulae & blastocysts % of cleaved |
|------------------------------------------|--------------------------|--------------------------|---------|------------------|-------------------|--------------|------------------|------------------------------------|
| zyg (M)                                  | fibroblast (I)           | Prometaphase             | 324     | 95* (29)         | ND                | 14           | 9                | 24                                 |
| Zyg (A)                                  | Fibroblast (I)           | Anaphase                 | 108     | 69* (64)         | 0                 | 0            | 0                | 0                                  |
| Zyg (M)                                  | PS (M)                   | Prometaphase             | 168     | 144 (85)         | ND                | 28           | 82               | 76                                 |
| Zyg (M)                                  | PS (I)                   | Prometaphase             | 46      | 25* (54)         | ND                | 2            | 2                | 16                                 |
| Zyg (A)                                  | PS (I)                   | Anaphase                 | 61      | 29* (47)         | 1                 | 0            | 0                | 0                                  |
| Zyg (A)                                  | PS (M)                   | Anaphase                 | 110     | 75* (68)         | ND                | 11           | 43               | 72                                 |
| Zyg (A)                                  | PS (T)                   | Anaphase                 | 3       | 2* (66)          | ND                | 1            | 1                | N/A                                |
| Zyg (M, & P/D)                           | PS (I)                   | Prometaphase             | 36      | 22* (61)         | 4                 | 0            | 0                | 0                                  |
| Zyg (M, & P/D)                           | PS (M)                   | Prometaphase             | 25      | 17* (68)         | ND                | 3            | 13               | 94                                 |
| Zyg (M, & P/D)                           | 8-12 cell (I)            | Prometaphase             | 42      | 18* (42)         | 11                | 4            | 2                | 33                                 |
| oocyte (MII)                             | PS (M)                   | meiosis                  | 19      | 12 (63)          | ND                | 2            | 4                | 50                                 |
| oocyte (MII) activated                   | PS (M)                   | meiosis                  | 56      | 31 (55)          | ND                | 7            | 20               | 87                                 |
| oocyte (MII)                             | PS (I)                   | meiosis                  | 76      | 40* (52)         | ND                | 0            | 12               | 30                                 |
| oocyte (MII) activated                   | PS (I)                   | meiosis                  | 81      | 53* (65)         | ND                | 2            | 2                | 7                                  |
| oocyte (MII)                             | Fibroblast (I)           | meiosis                  | 98      | 58* (60)         | ND                | 10           | 6                | 27                                 |

**Supplementary Table S4.** Karyotypic abnormalities in nuclear transfer blastomeres and blastomeres from IVF specimen. White and purple columns are the experimental data. White columns: not all blastomeres had these chromosomes determined. All cells are human.

| IVF specimen | 13 | 16 | 18 | 21 | 22 | 14 | 15 | 17 | X  | Y  |
|--------------|----|----|----|----|----|----|----|----|----|----|
| 1            | 3  | 3  | 3  | 3  | 3  | nd | nd | nd | nd | nd |
| 1            | 0  | 1  | 1  | 0  | 2  | nd | nd | nd | nd | nd |
| 2            | 5  | 6  | 5  | 5  | 5  | nd | nd | nd | nd | nd |
| 2            | 2  | 2  | 2  | 2  | 2  | 2  | 1  | 2  | 2  | 0  |
| 2            | 2  | 2  | 2  | 1  | 2  | 2  | 2  | 2  | 2  | 0  |
| 3            | 3  | 2  | 2  | 2  | 2  | 2  | 2  | 2  | 1  | 1  |
| 3            | 2  | 2  | 2  | 2  | 2  | 0  | 2  | 0  | 1  | 0  |
| 3            | 2  | 2  | 3  | 2  | 2  | 1  | 2  | 1  | 2  | 1  |
| 3            | 0  | 2  | 2  | 2  | 2  | nd | nd | nd | nd | nd |
| 3            | 0  | 2  | 1  | 2  | 2  | 2  | 2  | 2  | 1  | 1  |
| 3            | 2  | 2  | 2  | 2  | 2  | 2  | 2  | 2  | 1  | 1  |
| 3            | 2  | 2  | 2  | 2  | 2  | 1  | 3  | 2  | 2  | 1  |
| 3            | 1  | 2  | 3  | 2  | 1  | 2  | 2  | 2  | 1  | 1  |
|              | 2  | 2  | 1  | 2  | 2  | 0  | 3  | 0  | 1  | 2  |
| 4            | 4  | 4  | 4  | 4  | 4  | 4  | 4  | 4  | 4  | 0  |
| 4            | 2  | 1  | 1  | 2  | 0  | 2  | 1  | 2  | 2  | 0  |
| 4            | 5  | 4  | 4  | 4  | 4  | 0  | 4  | 4  | 4  | 0  |
| 4            | 2  | 2  | 2  | 2  | 2  | 2  | 2  | 2  | 2  | 0  |
| 5            | 2  | 2  | 2  | 2  | 2  | 2  | 2  | 2  | 1  | 1  |
| 5            | 2  | 2  | 2  | 2  | 2  | nd | nd | nd | nd | nd |
| 6            | 5  | 4  | 4  | 5  | 3  | 4  | 4  | 4  | 3  | 1  |
| 6            | 2  | 4  | 4  | 2  | 6  | 3  | 2  | 2  | 3  | 0  |
| 6            | 2  | 1  | 3  | 2  | 2  | nd | nd | nd | nd | nd |
|              |    |    |    |    |    |    |    |    |    |    |
| zygote SCNT  | 13 | 16 | 18 | 21 | 22 | 14 | 15 | 17 | X  | Y  |
| 1            | 2  | nd | 2  | 1  | nd | nd | nd | nd | 0  | 1  |
| 1            | 1  | nd | 2  | 1  | nd | nd | nd | nd | 1  | 1  |
| 1            | 2  | nd | 0  | 2  | nd | nd | nd | nd | 1  | 1  |
| 2            | 2  | nd | 1  | 1  | nd | nd | nd | nd | 1  | 1  |
| 2            | 1  | nd | 1  | 0  | nd | nd | nd | nd | 1  | 1  |

**Supplementary Table S5.** Bipolar and multipolar cleavage in tetraploid human zygotes and after nuclear transfer.

The variation in the expected number of centrosomes is due to the uncertainty in removing the zygotic centrosomes with the zygotic genome. Nd= not determined.

| Type of cell (expected number of centrosomes) | Total | Arrested at 1-cell stage | Fragmented | Cleavage to 2 cells | Cleavage to 3 cells | Cleavage to 4 cells | nd |
|-----------------------------------------------|-------|--------------------------|------------|---------------------|---------------------|---------------------|----|
| 2PN zygote (2)                                | 28    | 7                        | 2          | 18                  | -                   | -                   | -  |
| Polyspermic zygote (3 or more)                | 7     | 2                        | 1          | 1                   | 3                   | -                   | -  |
| Tetraploid zygote (4)                         | 17    | 6                        | 2          | 2                   | 3                   | 4                   | -  |
| NT into polyspermic zygotes (2-6)             | 8     | 3                        | 1          | -                   | 2                   | 2                   | -  |
| NT into 2PN zygotes (2-4)                     | 53    | 17                       | 3          | 11                  | 5                   | 3                   | 14 |



**Supplemental Table S6.** Bipolar cleavage in mouse and rabbit tri- and tetraploid zygotes

| Cell Type                                                             | Total | Cleaved to 2-cell                   | Blastocysts |
|-----------------------------------------------------------------------|-------|-------------------------------------|-------------|
| Polyspermic mouse zygote                                              | 18    | 14 (4 are arrested at 1-cell stage) | 14          |
| Tetraploid mouse zygote (inhibition of cytokinesis at first mitosis)  | 19    | 17                                  | 16          |
| Tetraploid rabbit zygote (inhibition of cytokinesis at first mitosis) | 8     | 8                                   | 8           |

**Supplemental Table S7.** Effective nocodazole and vinblastine concentrations in human zygotes. Nocodazole. n/a: not applicable. \* cleavage only after release from vinblastine or nocodazole. At lower concentrations cleavage occurs in the presence of nocodazole.

| Number of zygotes | Microtubule inhibitor | Time point of drug application | Spindle assembly              | # of zygotes that underwent cleavage | Development              | Cell line     |
|-------------------|-----------------------|--------------------------------|-------------------------------|--------------------------------------|--------------------------|---------------|
| 6                 | 2 µg/ml nocodazole    | 2PN                            | Yes                           | n/a                                  | n/a                      | n/a           |
| 3                 | 2 µg/ml nocodazole    | Mitosis                        | Yes                           | 3                                    | 1 blastocyst<br>2 morula | HUES47 (46XX) |
| 1                 | 4 µg/ml nocodazole    | Mitosis                        | Yes                           | 1                                    | n/a                      | n/a           |
| 13                | 50 µg/ml nocodazole   | Mitosis                        | No, spindle de-polymerization | 10*                                  | 1 blastocyst             | -             |
| 4                 | 1mM Vinblastine       | Mitosis                        | No, spindle de-polymerization | 1*                                   | 1 morula                 | -             |
